# Supplementary material for: NeuroActivityToolkit—Toolbox for Quantitative Analysis of Miniature Fluorescent Microscopy Data
Source: J Imaging. 2023 Nov 6;9(11):243. doi: 10.3390/jimaging9110243 (PMC10672520; doi:10.3390/jimaging9110243)
Supplement: Supplementary file 1 [file jimaging-09-00243-s001.zip]

Archive with 5 entries (5 files):
- Supplementary Materials (figures).pdf
- Supplementary Materials (tutorial).pdf
- Supplementary Video S1.avi
- Supplementary Video S2.avi
- Supplementary Video S3.avi
